# Supplementary material for: Joint association of serum urate and healthy diet with chronic obstructive pulmonary disease incidence: results from the UK Biobank study
Source: Royal Society of Chemistry journal article supplement (doi:10.1039/d3fo02750c), 2024-01-01
Supplement: d3fo02750c1.pdf [file d3fo02750c1.pdf]

**Joint Association of Serum Urate and Healthy Diet with Chronic Obstructive  
Pulmonary Disease Incidence: Results from the UK Biobank Study**

## **Method**

### **Assessment of genetic risk score**

Genetic background is thought to account for approximately 40% of the variation in susceptibility to COPD [1, 2]. Therefore, in our sensitivity analysis, we categorized the genetic risk into three groups. Detailed information on the genetic data of the UK Biobank study is available elsewhere [3]. Briefly, the custom Affymetrix UK Biobank Axiom array was used to genotype samples of study participants from the UK Biobank. Genotype data were phased using SHAPEIT3, and IMPUTE3 was used to impute to a merged reference panel of the UK10K and 1000 Genomes phase 3 [4]. To evaluate the genetic predisposition for COPD, a genetic risk score (GRS) for COPD was created. After LD clumping ( $r^2 < 0.2$ , 1000 kb), we selected 279 independent single nucleotide polymorphisms (SNPs) from a previously published genome-wide association analysis [5] (Table S2). A weighted-GRS was calculated based on the amount of risk alleles of each SNP, coding as 0, 1, or 2, then multiplied by the relative effect size ( $\beta$  coefficient) obtained from the previously published genome-wide association analysis [5], summed, and then z-standardized to create a COPD-GRS for all individuals. The COPD-GRS was oriented, so that a higher COPD-GRS was associated with lower lung function. GRS was categorized into high (tertile 3), middle (tertile 2), and low (tertile 1). The distribution of COPD-GRS was normal and is presented in Fig. S2.

### **Assessment of Mediterranean diet score (MDS)**

The MDS is a composite scoring system that incorporates both food-based and nutrient-based elements to evaluate adherence to a Mediterranean-style diet. In this investigation, a nine-item index, previously described and adapted, was employed [6, 7]. Food and nutrient consumption were assessed based on nine specific components, including vegetables, legumes, fruits and nuts, cereals, fish and seafood, the ratio of monounsaturated fats to saturated fats, dairy products, meat and meat products, and alcohol. Cut-off points for the score of each component were determined using sex-specific median intakes. Participants surpassing the median intake for vegetables, legumes, fruits and nuts, cereals, fish and seafood, and the monounsaturated to saturated fats ratio received a score of 1. Conversely, participants falling below the median intake for dairy products and meat and meat products were also assigned a score of 1. For alcohol, a score of 1 denoted low to moderate intake, equivalent to consuming alcohol once or twice daily. A score of 0 was assigned for either no

alcohol intake or an intake exceeding twice daily. The overall MDS score ranged from 0 to 9, with higher scores indicative of greater adherence to the Mediterranean diet.

**Reference:**

1. Wilk, J.B., et al., A genome-wide association study of pulmonary function measures in the Framingham Heart Study. *PLoS Genet*, 2009. 5(3): p. e1000429.
2. Palmer, L.J., et al., Familial aggregation and heritability of adult lung function: results from the Busselton Health Study. *Eur Respir J*, 2001. 17(4): p. 696-702.
3. Bycroft C, F.C., Petkova D, Band G, Elliott LT, Sharp K, Motyer A, Vukcevic D, Delaneau O, O'Connell J, Cortes A, Welsh S, McVean G, Leslie S, Donnelly P, Marchini J., *Genome-wide genetic data on ~500,000 UK Biobank participants*. bioRxiv, 2017. July 20.
4. J, M., UK Biobank., UK Biobank phasing and imputation documentation.
5. Shrine, N., et al., New genetic signals for lung function highlight pathways and chronic obstructive pulmonary disease associations across multiple ancestries. *Nat Genet*, 2019. 51(3): p. 481-493.
6. Petermann-Rocha, F., et al., Association of five diet scores with severe NAFLD incidence: A prospective study from UK Biobank. *Diabetes Obes Metab*, 2024. 26(3): p. 860-870.
7. Livingstone, K.M., et al., Diet quality indices, genetic risk and risk of cardiovascular disease and mortality: a longitudinal analysis of 77 004 UK Biobank participants. *BMJ Open*, 2021. 11(4): p. e045362.

**Table legends:**

Table S1. Healthy diet components.

Table S2. Single nucleotide polymorphisms (SNPs) used to build the genetic risk score for COPD.

Table S3. Participants baseline characteristics according to COPD status (n = 155,403).

Table S4. Association between hyperuricemia and risk of COPD (n = 155,403).

Table S5. Hazards ratios (HRs) and 95% confidence interval (CIs) of COPD by joint effect of SU levels and diet score after excluding COPD occurred within first 3 years of follow up (n = 154,990).

Table S6. Association between genetic risk and the risk of COPD (n = 153,620).

Table S7. Hazards ratios (HRs) and 95% confidence interval (CIs) of COPD by joint effect of SU levels and diet score in subgroup analyses.

Table S8. Hazards ratios (HRs) and 95% confidence interval (CIs) of COPD by joint exposures of SU levels and diet score: results from competing risk regression model (n = 155,403).

Table S9. Association between weighted diet score and risk of COPD (n = 155,403).

Table S10. Hazards ratios (HRs) and 95% confidence interval (CIs) of COPD by joint exposures of SU levels and weighted diet score (n = 155,403).

Table S11. Hazards ratios (HRs) and 95% confidence interval (CIs) of COPD by joint effect of SU levels and diet score additionally adjusted for baseline estimated glomerular filtration rate.

Table S12. Association between SU levels and risk of COPD after excluding baseline FEV1/FVC<0.7 (n = 132,192).

Table S13. Hazards ratios (HRs) and 95% confidence interval (CIs) of COPD by joint effect of SU levels and diet score after excluding participants diagnosed with diabetes, hypertension, and kidney disease at baseline (n = 118,185).

Table S14. Associations between Mediterranean diet score (MDS) and risk of COPD (n = 155,403).

Table S15. The associations of joint exposures of SU levels and MDS with the risk of COPD (n = 155,403).

**Figure legends:**

Fig. S1 Flowchart for the selection of the analyzed study sample.

Fig. S2 Distribution of COPD-GRS.

**Table S1. Healthy diet components.**

| Diet factors         | Field IDs              | Description                                                                    | Score               |                    |
|----------------------|------------------------|--------------------------------------------------------------------------------|---------------------|--------------------|
|                      |                        |                                                                                | 0                   | 1                  |
| Vegetables           | 1289, 1299             | Cooked vegetable and salad /raw vegetable                                      | <3 servings/day     | ≥3 servings/day    |
| Fruits               | 1309, 1319             | Fresh fruit and dried fruit                                                    | <3 servings/day     | ≥3 servings/day    |
| Fish                 | 1329, 1339             | Oily fish and non-oily fish                                                    | <2 servings/week    | ≥2 servings/week   |
| Processed meats      | 1349                   | Processed meat                                                                 | >1 servings/week    | ≤1 servings/week   |
| Unprocessed red meat | 1369, 1379, 1389, 1359 | Beef, lamb or mutton, and pork intake                                          | >1.5 servings/week; | ≤1.5 servings/week |
| Whole grains         |                        | Brown bread, wholemeal and wholegrain bread, bran and oat cereal               | <3 servings/day     | ≥3 servings/day    |
| Refined grains       | 1369, 1379, 1389, 1359 | White and other type of bread, biscuit cereal, muesli and other type of cereal | >1.5 servings/week; | ≤1.5 servings/week |

**Table S2. Single nucleotide polymorphisms (SNPs) used to build the genetic risk score for COPD.**

| SNP         | Chr | BP        | A1 | A2 | FreqRisk | Beta    | SE     | P        |
|-------------|-----|-----------|----|----|----------|---------|--------|----------|
| rs9661802   | 1   | 6678864   | A  | C  | 0.6649   | 0.0247  | 0.0025 | 5.56E-23 |
| rs12737805  | 1   | 22612690  | A  | G  | 0.7787   | 0.0022  | 0.0029 | 4.50E-01 |
| rs9438626   | 1   | 26775367  | C  | G  | 0.21     | 0.0067  | 0.0029 | 2.03E-02 |
| rs12096239  | 1   | 26796922  | C  | G  | 0.253    | -0.0099 | 0.0027 | 2.68E-04 |
| rs1416685   | 1   | 51243374  | C  | G  | 0.4053   | 0.0202  | 0.0024 | 5.62E-17 |
| rs72673461  | 1   | 60966772  | T  | G  | 0.9507   | 0.0508  | 0.0055 | 3.12E-20 |
| rs9661687   | 1   | 78387270  | T  | C  | 0.8633   | -0.0271 | 0.0035 | 6.11E-15 |
| rs10874851  | 1   | 92106637  | A  | C  | 0.4776   | -0.0139 | 0.0024 | 5.07E-09 |
| rs9970286   | 1   | 111737398 | A  | G  | 0.3291   | 0.0236  | 0.0025 | 1.92E-20 |
| rs11205354  | 1   | 150249101 | A  | C  | 0.444    | 0.0112  | 0.0024 | 3.46E-06 |
| rs141942982 | 1   | 155137395 | T  | G  | 0.1066   | -0.0362 | 0.0039 | 9.57E-21 |
| rs4651005   | 1   | 178719306 | T  | C  | 0.3214   | 0.0048  | 0.0025 | 6.13E-02 |
| rs2146098   | 1   | 186090370 | A  | G  | 0.6452   | 0.0164  | 0.0025 | 4.15E-11 |
| rs17531405  | 1   | 186113852 | C  | G  | 0.1804   | 0.028   | 0.0031 | 2.80E-19 |
| rs10919604  | 1   | 198898157 | A  | G  | 0.6028   | 0.0198  | 0.0024 | 4.48E-16 |
| rs4309038   | 1   | 201884647 | C  | G  | 0.4346   | 0.0153  | 0.0024 | 2.13E-10 |
| rs2799098   | 1   | 218521609 | A  | G  | 0.8201   | -0.0285 | 0.0031 | 5.00E-20 |
| rs75128958  | 1   | 219483218 | A  | G  | 0.0774   | -0.0445 | 0.0045 | 2.33E-23 |
| rs17009288  | 1   | 221204299 | A  | C  | 0.7061   | 0.0072  | 0.0026 | 6.08E-03 |
| rs2544536   | 2   | 15906854  | T  | C  | 0.4881   | -0.0239 | 0.0024 | 4.15E-24 |
| rs6751968   | 2   | 18570024  | A  | C  | 0.1787   | 0.0065  | 0.0031 | 3.51E-02 |
| rs13430465  | 2   | 18702313  | T  | C  | 0.0803   | 0.0079  | 0.0044 | 7.10E-02 |
| rs13009582  | 2   | 24018480  | A  | G  | 0.4505   | 0.0022  | 0.0024 | 3.49E-01 |
| rs732990    | 2   | 26842146  | C  | G  | 0.4431   | 0.0122  | 0.0024 | 2.84E-07 |
| rs4952564   | 2   | 42243850  | A  | G  | 0.681    | 0.001   | 0.0025 | 7.01E-01 |
| rs12470864  | 2   | 102926362 | A  | G  | 0.3854   | -0.0203 | 0.0024 | 1.04E-16 |
| rs1406225   | 2   | 145797829 | T  | G  | 0.2836   | -0.0197 | 0.0026 | 8.73E-14 |
| rs7424771   | 2   | 161276378 | A  | G  | 0.4468   | -0.0097 | 0.0024 | 5.34E-05 |
| rs2304340   | 2   | 179260382 | A  | G  | 0.4084   | 0.0007  | 0.0024 | 7.74E-01 |
| rs2084448   | 2   | 187530520 | T  | C  | 0.7063   | 0.0197  | 0.0026 | 4.65E-14 |

|            |   |           |   |   |        |         |        |           |
|------------|---|-----------|---|---|--------|---------|--------|-----------|
| rs1249096  | 2 | 199723365 | A | G | 0.5634 | -0.0026 | 0.0024 | 2.76E-01  |
| rs985256   | 2 | 201208692 | A | C | 0.2185 | 0.0179  | 0.0029 | 5.86E-10  |
| rs12997625 | 2 | 202970250 | T | C | 0.5284 | 0.0065  | 0.0024 | 6.20E-03  |
| rs6435952  | 2 | 217614730 | A | T | 0.1505 | 0.0258  | 0.0033 | 1.06E-14  |
| rs4294980  | 2 | 218604356 | A | G | 0.7894 | 0.0031  | 0.0029 | 2.95E-01  |
| rs4674407  | 2 | 220382700 | T | C | 0.4969 | 0.0096  | 0.0024 | 6.80E-05  |
| rs6431620  | 2 | 239604970 | T | G | 0.7887 | 0.0086  | 0.0029 | 3.31E-03  |
| rs6437219  | 2 | 241844033 | T | C | 0.5217 | -0.0108 | 0.0025 | 2.01E-05  |
| rs6733504  | 2 | 242495953 | A | G | 0.5464 | -0.0032 | 0.0024 | 1.84E-01  |
| rs2974389  | 3 | 13787641  | A | G | 0.4265 | 0.0037  | 0.0024 | 1.18E-01  |
| rs73048404 | 3 | 25179533  | T | G | 0.8529 | -0.0044 | 0.0033 | 1.86E-01  |
| rs35480566 | 3 | 71583177  | A | G | 0.56   | 0.0002  | 0.0024 | 9.22E-01  |
| rs586936   | 3 | 73862616  | A | G | 0.4022 | -0.018  | 0.0025 | 2.11E-13  |
| rs1610265  | 3 | 99420192  | T | C | 0.0769 | 0.0074  | 0.0045 | 9.74E-02  |
| rs1799807  | 3 | 165548529 | T | C | 0.9809 | 0.0598  | 0.0088 | 8.59E-12  |
| rs6780171  | 3 | 185503456 | A | T | 0.3129 | -0.0106 | 0.0026 | 3.65E-05  |
| rs12331869 | 4 | 56012149  | A | G | 0.1789 | -0.0076 | 0.0031 | 1.41E-02  |
| rs62316310 | 4 | 75676529  | A | G | 0.2603 | 0.0272  | 0.0027 | 2.24E-23  |
| rs11098196 | 4 | 79403952  | T | G | 0.5083 | -0.0196 | 0.0024 | 2.42E-16  |
| rs13109426 | 4 | 145330628 | A | G | 0.5918 | 0.0093  | 0.0024 | 1.32E-04  |
| rs13116999 | 4 | 145442364 | A | G | 0.5379 | 0.0535  | 0.0024 | 6.63E-111 |
| rs11739847 | 5 | 609661    | A | G | 0.1992 | -0.0179 | 0.003  | 1.40E-09  |
| rs4866846  | 5 | 43976162  | A | G | 0.1499 | 0.012   | 0.0033 | 3.22E-04  |
| rs10059661 | 5 | 121410529 | C | G | 0.8263 | -0.0308 | 0.0032 | 1.78E-22  |
| rs17163397 | 5 | 128767384 | A | G | 0.8764 | -0.0307 | 0.0036 | 3.30E-17  |
| rs1800888  | 5 | 148206885 | T | C | 0.0147 | -0.1081 | 0.01   | 2.41E-27  |
| rs10059996 | 5 | 170901463 | T | G | 0.3548 | -0.0352 | 0.0026 | 1.53E-42  |
| rs79898473 | 5 | 179598771 | T | C | 0.671  | -0.0308 | 0.0026 | 2.31E-33  |
| rs12198986 | 6 | 7720059   | A | G | 0.478  | -0.0005 | 0.0024 | 8.22E-01  |
| rs9689096  | 6 | 34188892  | A | C | 0.9374 | -0.0085 | 0.005  | 8.52E-02  |
| rs9357446  | 6 | 44447598  | A | G | 0.5169 | 0.0011  | 0.0024 | 6.38E-01  |
| rs12202314 | 6 | 45530471  | T | C | 0.6753 | -0.0209 | 0.0025 | 2.17E-16  |
| rs9472541  | 6 | 45622748  | A | T | 0.2853 | 0.0068  | 0.0026 | 1.01E-02  |

|            |    |           |   |   |        |         |        |          |
|------------|----|-----------|---|---|--------|---------|--------|----------|
| rs2894837  | 6  | 56336406  | A | G | 0.6398 | 0.0147  | 0.0025 | 3.78E-09 |
| rs2627237  | 6  | 134339265 | A | G | 0.5893 | 0.0037  | 0.0024 | 1.29E-01 |
| rs1102077  | 6  | 140271357 | A | C | 0.7574 | 0.0168  | 0.0028 | 2.02E-09 |
| rs9385988  | 6  | 142560957 | A | G | 0.7232 | -0.0315 | 0.0027 | 2.43E-32 |
| rs4721457  | 7  | 15872324  | T | C | 0.8494 | 0.0244  | 0.0033 | 1.73E-13 |
| rs559233   | 7  | 26848830  | T | C | 0.4857 | 0.0105  | 0.0024 | 1.19E-05 |
| rs62454414 | 7  | 27182329  | T | G | 0.8668 | -0.0046 | 0.0035 | 1.85E-01 |
| rs1513272  | 7  | 28200097  | T | C | 0.4996 | 0.005   | 0.0024 | 3.29E-02 |
| rs17232687 | 7  | 46448518  | T | C | 0.4956 | -0.0036 | 0.0024 | 1.35E-01 |
| rs12707691 | 7  | 84569510  | C | G | 0.6642 | -0.011  | 0.0025 | 1.54E-05 |
| rs193686   | 7  | 116431427 | T | C | 0.6834 | -0.0178 | 0.0026 | 4.07E-12 |
| rs330939   | 8  | 9018590   | T | G | 0.6216 | 0.0232  | 0.0025 | 4.46E-21 |
| rs4128298  | 8  | 11823332  | T | C | 0.7176 | -0.0199 | 0.0026 | 4.97E-14 |
| rs7465401  | 8  | 70367248  | T | C | 0.7263 | -0.0175 | 0.0027 | 6.84E-11 |
| rs7838717  | 8  | 145504343 | T | C | 0.3631 | 0.0008  | 0.0025 | 7.60E-01 |
| rs7041139  | 9  | 18013733  | T | C | 0.3221 | -0.008  | 0.0025 | 1.54E-03 |
| rs72743974 | 9  | 98878881  | A | G | 0.8328 | -0.0232 | 0.0032 | 3.98E-13 |
| rs57649467 | 9  | 101632854 | A | G | 0.3885 | 0.0178  | 0.0025 | 5.39E-13 |
| rs967497   | 9  | 131943843 | A | G | 0.3102 | 0.0101  | 0.0026 | 9.14E-05 |
| rs1274475  | 10 | 34480582  | A | G | 0.3922 | 0.0168  | 0.0025 | 8.30E-12 |
| rs60820984 | 10 | 75639578  | T | C | 0.1867 | -0.0233 | 0.0031 | 4.32E-14 |
| rs11191841 | 10 | 105639611 | T | C | 0.4914 | -0.0092 | 0.0024 | 1.14E-04 |
| rs10836366 | 11 | 35308988  | T | C | 0.7486 | 0.0191  | 0.0027 | 2.33E-12 |
| rs56196860 | 12 | 2908330   | A | C | 0.0312 | 0.0063  | 0.007  | 3.65E-01 |
| rs12811814 | 12 | 4243749   | T | C | 0.4576 | 0.0061  | 0.0024 | 1.14E-02 |
| rs10841302 | 12 | 19808912  | C | G | 0.5464 | 0.0167  | 0.0024 | 2.29E-12 |
| rs1244869  | 12 | 65075332  | T | G | 0.632  | 0.0153  | 0.0025 | 6.16E-10 |
| rs11176001 | 12 | 66409367  | A | C | 0.1309 | -0.0151 | 0.0035 | 2.04E-05 |
| rs972936   | 12 | 102824921 | T | C | 0.2625 | 0.003   | 0.0027 | 2.65E-01 |
| rs2701110  | 12 | 114669870 | A | C | 0.1664 | 0.0189  | 0.0032 | 4.53E-09 |
| rs9533803  | 13 | 44820608  | T | C | 0.2134 | -0.0261 | 0.0029 | 2.92E-19 |
| rs2812208  | 13 | 50707087  | C | G | 0.0212 | 0.0048  | 0.0083 | 5.58E-01 |
| rs803765   | 13 | 71647588  | A | C | 0.3452 | 0.0079  | 0.0025 | 1.56E-03 |



|            |    |           |   |   |        |         |        |          |
|------------|----|-----------|---|---|--------|---------|--------|----------|
| rs4885681  | 13 | 80467235  | T | C | 0.7248 | 0.0055  | 0.0027 | 4.05E-02 |
| rs11620380 | 13 | 99665512  | A | C | 0.1046 | -0.027  | 0.0039 | 4.61E-12 |
| rs9634470  | 13 | 109918493 | T | C | 0.7347 | -0.0208 | 0.0027 | 2.73E-14 |
| rs1951121  | 14 | 23429729  | T | G | 0.6011 | 0.0189  | 0.0024 | 7.55E-15 |
| rs74053129 | 14 | 54346010  | A | G | 0.0959 | 0.0392  | 0.004  | 2.15E-22 |
| rs10141786 | 14 | 74817418  | A | G | 0.4017 | -0.0041 | 0.0024 | 9.61E-02 |
| rs34245505 | 15 | 40397191  | C | G | 0.805  | -0.0218 | 0.003  | 6.83E-13 |
| rs2304645  | 15 | 40716253  | C | G | 0.5179 | -0.0005 | 0.0024 | 8.40E-01 |
| rs4924525  | 15 | 41255396  | A | C | 0.5221 | 0.0047  | 0.0024 | 4.66E-02 |
| rs79234094 | 15 | 49409527  | A | G | 0.2624 | 0.0268  | 0.0027 | 3.18E-23 |
| rs35251997 | 15 | 49706145  | A | T | 0.931  | -0.0506 | 0.0047 | 2.82E-27 |
| rs62012772 | 15 | 63866877  | T | C | 0.8222 | -0.0288 | 0.0031 | 2.42E-20 |
| rs7176074  | 15 | 73833600  | T | G | 0.0509 | 0.0339  | 0.0055 | 6.60E-10 |
| rs3751837  | 16 | 3583173   | T | C | 0.2202 | 0.0108  | 0.0029 | 1.66E-04 |
| rs56104880 | 16 | 4361138   | T | C | 0.6948 | 0.0205  | 0.0026 | 5.29E-15 |
| rs11074547 | 16 | 10136889  | T | G | 0.7378 | 0.0059  | 0.0027 | 2.73E-02 |
| rs76219171 | 16 | 50188929  | A | G | 0.0601 | 0.0089  | 0.0051 | 7.95E-02 |
| rs35420030 | 16 | 53935407  | T | C | 0.9466 | -0.045  | 0.0053 | 3.08E-17 |
| rs12918140 | 16 | 86403821  | C | G | 0.1146 | -0.027  | 0.0038 | 6.72E-13 |
| rs6539952  | 16 | 86579223  | A | C | 0.2615 | -0.0159 | 0.0027 | 6.84E-09 |
| rs8082036  | 17 | 3882613   | C | G | 0.5123 | 0.0238  | 0.0024 | 7.31E-24 |
| rs4796334  | 17 | 6469793   | A | G | 0.5025 | -0.0068 | 0.0024 | 4.03E-03 |
| rs1215     | 17 | 7163350   | A | G | 0.8567 | -0.006  | 0.0034 | 7.95E-02 |
| rs4968200  | 17 | 7448457   | C | G | 0.1421 | -0.0127 | 0.0034 | 1.81E-04 |
| rs34351630 | 17 | 16030520  | T | C | 0.4654 | 0.0001  | 0.0024 | 9.55E-01 |
| rs12945803 | 17 | 46552229  | T | C | 0.7822 | -0.0021 | 0.0029 | 4.71E-01 |
| rs28519449 | 17 | 54195453  | T | C | 0.4043 | 0.0017  | 0.0024 | 4.82E-01 |
| rs8068952  | 17 | 59286644  | C | G | 0.7839 | -0.0285 | 0.0029 | 1.21E-22 |
| rs77672322 | 17 | 62497964  | T | C | 0.0264 | 0.0279  | 0.0077 | 3.06E-04 |
| rs11653958 | 17 | 62686730  | A | G | 0.7425 | 0.0197  | 0.0028 | 9.17E-13 |
| rs996865   | 17 | 69371318  | T | C | 0.0753 | -0.0475 | 0.0046 | 1.82E-25 |
| rs59606152 | 17 | 79952944  | T | C | 0.1115 | -0.0175 | 0.004  | 1.10E-05 |
| rs8089099  | 18 | 10078071  | A | G | 0.2746 | 0.0235  | 0.0027 | 1.52E-18 |

|             |    |           |   |   |        |         |        |          |
|-------------|----|-----------|---|---|--------|---------|--------|----------|
| rs1985511   | 18 | 19816712  | A | T | 0.4503 | 0.0165  | 0.0024 | 5.60E-12 |
| rs303752    | 18 | 21074255  | A | G | 0.409  | -0.0011 | 0.0024 | 6.57E-01 |
| rs1668091   | 18 | 22290711  | T | C | 0.681  | 0.0015  | 0.0025 | 5.44E-01 |
| rs9807668   | 18 | 42827898  | T | C | 0.0946 | 0.0252  | 0.0041 | 4.93E-10 |
| rs2202572   | 18 | 53566471  | A | C | 0.3289 | 0.0005  | 0.0025 | 8.37E-01 |
| rs11085744  | 19 | 10819967  | T | C | 0.5595 | -0.0098 | 0.0024 | 4.01E-05 |
| rs2967516   | 19 | 36881643  | A | G | 0.709  | 0.0092  | 0.0026 | 4.18E-04 |
| rs6032942   | 20 | 10745545  | C | G | 0.2325 | 0.0227  | 0.0028 | 5.19E-16 |
| rs12627254  | 21 | 35368402  | T | G | 0.1279 | 0.0357  | 0.0035 | 6.85E-24 |
| rs113111175 | 22 | 50867711  | T | C | 0.1219 | 0.0102  | 0.0037 | 5.72E-03 |
| rs9435733   | 1  | 17308254  | T | C | 0.4817 | 0.0389  | 0.0024 | 5.95E-61 |
| rs755249    | 1  | 39995074  | T | C | 0.2328 | -0.0239 | 0.0028 | 9.82E-18 |
| rs1192415   | 1  | 92077097  | A | G | 0.8122 | 0.044   | 0.003  | 2.28E-47 |
| rs11165787  | 1  | 92381483  | A | G | 0.6878 | 0.0245  | 0.0026 | 1.63E-21 |
| rs35043843  | 1  | 118911295 | T | G | 0.7562 | 0.0039  | 0.0028 | 1.63E-01 |
| rs878471    | 1  | 150547747 | A | G | 0.5797 | 0.0063  | 0.0024 | 9.02E-03 |
| rs2816992   | 1  | 200069216 | A | G | 0.5879 | 0.0042  | 0.0024 | 7.98E-02 |
| rs1008833   | 1  | 204426295 | A | G | 0.8541 | -0.0129 | 0.0034 | 1.27E-04 |
| rs556648    | 1  | 215120596 | A | G | 0.2166 | -0.0018 | 0.0029 | 5.36E-01 |
| rs6604614   | 1  | 218631452 | C | G | 0.7152 | -0.0085 | 0.0026 | 1.25E-03 |
| rs28613267  | 1  | 218855029 | C | G | 0.5112 | 0.0062  | 0.0024 | 9.94E-03 |
| rs1338227   | 1  | 219853742 | T | G | 0.5774 | 0.0245  | 0.0024 | 3.92E-24 |
| rs12757436  | 1  | 221631938 | A | G | 0.3349 | -0.0079 | 0.0025 | 1.64E-03 |
| rs2355237   | 1  | 239857524 | A | G | 0.5124 | 0.0278  | 0.0024 | 1.77E-31 |
| rs55884799  | 2  | 18287623  | T | C | 0.8271 | -0.0415 | 0.0031 | 4.02E-40 |
| rs3791679   | 2  | 56096892  | A | G | 0.7714 | -0.0231 | 0.0028 | 3.02E-16 |
| rs62168891  | 2  | 135672187 | T | C | 0.4032 | 0.0023  | 0.0024 | 3.48E-01 |
| rs72902177  | 2  | 157016257 | T | C | 0.1346 | -0.0332 | 0.0035 | 2.20E-21 |
| rs2571445   | 2  | 218683154 | A | G | 0.3971 | -0.0199 | 0.0024 | 3.08E-16 |
| rs62201738  | 2  | 229502197 | A | C | 0.9218 | -0.0743 | 0.0044 | 9.45E-63 |
| rs6710301   | 2  | 239441308 | A | C | 0.1492 | 0.0223  | 0.0033 | 2.71E-11 |
| rs4308141   | 2  | 239881309 | C | G | 0.8011 | -0.0484 | 0.003  | 3.58E-59 |
| rs1529672   | 3  | 25520582  | A | C | 0.1736 | 0.0423  | 0.0031 | 1.73E-41 |

|            |   |           |   |   |        |         |        |           |
|------------|---|-----------|---|---|--------|---------|--------|-----------|
| rs17666332 | 3 | 29469675  | T | G | 0.7235 | 0.0267  | 0.0027 | 9.22E-24  |
| rs12715478 | 3 | 55152319  | A | G | 0.5941 | 0.025   | 0.0024 | 1.35E-24  |
| rs6445932  | 3 | 57879611  | T | G | 0.7519 | -0.0248 | 0.0028 | 2.38E-19  |
| rs4132748  | 3 | 67455803  | T | C | 0.3068 | -0.0044 | 0.0026 | 9.11E-02  |
| rs12497779 | 3 | 98822050  | T | G | 0.2334 | 0.0003  | 0.0028 | 9.19E-01  |
| rs2999090  | 3 | 127931340 | A | G | 0.881  | -0.0433 | 0.0037 | 6.76E-32  |
| rs12634907 | 3 | 158226886 | A | G | 0.6558 | -0.0051 | 0.0025 | 4.29E-02  |
| rs879394   | 3 | 168709843 | T | G | 0.2348 | -0.0298 | 0.0028 | 4.71E-26  |
| rs78101726 | 3 | 169295436 | A | G | 0.8459 | 0.0182  | 0.0033 | 3.65E-08  |
| rs62289340 | 4 | 7879027   | T | C | 0.4358 | 0.0167  | 0.0024 | 2.36E-12  |
| rs2609279  | 4 | 89855495  | T | C | 0.2145 | 0.0537  | 0.0029 | 2.08E-76  |
| rs2869966  | 4 | 89869078  | T | C | 0.4065 | -0.0415 | 0.0024 | 5.78E-66  |
| rs6533183  | 4 | 106133184 | T | C | 0.6545 | -0.0297 | 0.0025 | 2.60E-32  |
| rs11722225 | 4 | 106766430 | T | C | 0.9335 | -0.0478 | 0.0048 | 1.68E-23  |
| rs34712979 | 4 | 106819053 | A | G | 0.2561 | -0.0682 | 0.0028 | 4.18E-134 |
| rs13141641 | 4 | 145506456 | T | C | 0.601  | -0.0704 | 0.0024 | 3.65E-184 |
| rs2353940  | 4 | 145740898 | T | C | 0.7462 | 0.0246  | 0.0028 | 5.01E-19  |
| rs268717   | 5 | 33352738  | T | C | 0.9074 | -0.0004 | 0.0041 | 9.18E-01  |
| rs6859730  | 5 | 44367221  | A | T | 0.3275 | -0.004  | 0.0025 | 1.10E-01  |
| rs12522114 | 5 | 52187038  | A | C | 0.265  | -0.0367 | 0.0027 | 1.47E-41  |
| rs2441026  | 5 | 53444498  | T | C | 0.4625 | 0.003   | 0.0024 | 2.11E-01  |
| rs425102   | 5 | 77396400  | T | G | 0.7597 | -0.0075 | 0.0028 | 7.13E-03  |
| rs987068   | 5 | 95025146  | C | G | 0.6889 | -0.0296 | 0.0026 | 1.46E-30  |
| rs3843503  | 5 | 131466629 | A | T | 0.4482 | 0.0118  | 0.0024 | 1.28E-06  |
| rs7733410  | 5 | 147856522 | A | G | 0.4407 | 0.0505  | 0.0024 | 1.56E-96  |
| rs11952673 | 5 | 148652302 | T | G | 0.3989 | -0.0125 | 0.0025 | 3.35E-07  |
| rs11134766 | 5 | 156908317 | T | C | 0.0635 | -0.0628 | 0.0049 | 8.04E-38  |
| rs11134789 | 5 | 156944199 | A | C | 0.3412 | -0.0408 | 0.0025 | 3.06E-59  |
| rs1294417  | 6 | 6741932   | T | C | 0.4577 | -0.0311 | 0.0024 | 3.93E-39  |
| rs2076295  | 6 | 7563232   | T | G | 0.5497 | -0.0234 | 0.0024 | 6.95E-23  |
| rs10498672 | 6 | 7797840   | C | G | 0.8227 | -0.0034 | 0.0031 | 2.70E-01  |
| rs13198081 | 6 | 22017543  | C | G | 0.3532 | 0.0297  | 0.0025 | 3.07E-33  |
| rs7752448  | 6 | 28301099  | A | G | 0.8746 | 0.0288  | 0.0036 | 7.31E-16  |

|            |    |           |   |   |        |         |        |           |
|------------|----|-----------|---|---|--------|---------|--------|-----------|
| rs2070600  | 6  | 32151443  | T | C | 0.0629 | 0.1452  | 0.0049 | 3.00E-189 |
| rs9274247  | 6  | 32631295  | A | G | 0.3212 | -0.0469 | 0.003  | 9.79E-57  |
| rs13206405 | 6  | 73663814  | A | C | 0.2015 | 0.0344  | 0.003  | 4.67E-31  |
| rs2798641  | 6  | 109268050 | T | C | 0.1829 | -0.045  | 0.0031 | 3.89E-48  |
| rs6918725  | 6  | 126990392 | T | G | 0.4813 | 0.0097  | 0.0024 | 5.19E-05  |
| rs17280293 | 6  | 142688969 | A | G | 0.973  | -0.1803 | 0.0074 | 2.34E-131 |
| rs7753012  | 6  | 142745883 | T | G | 0.6949 | -0.0712 | 0.0026 | 4.71E-165 |
| rs4318980  | 7  | 7256490   | A | G | 0.4147 | -0.0172 | 0.0024 | 9.08E-13  |
| rs4721442  | 7  | 15506007  | T | G | 0.8339 | -0.0048 | 0.0032 | 1.32E-01  |
| rs2261360  | 7  | 99692993  | T | G | 0.2322 | 0.0219  | 0.0028 | 8.74E-15  |
| rs12698403 | 7  | 156127246 | A | G | 0.4418 | -0.0236 | 0.0024 | 1.48E-22  |
| rs771662   | 9  | 1568941   | T | C | 0.3493 | -0.0024 | 0.0025 | 3.39E-01  |
| rs1570203  | 9  | 4120648   | A | G | 0.5296 | 0.0246  | 0.0024 | 5.78E-25  |
| rs1107677  | 9  | 23587027  | T | C | 0.4845 | 0.0219  | 0.0024 | 3.88E-20  |
| rs28446321 | 9  | 98266855  | A | T | 0.0907 | -0.0523 | 0.0042 | 4.72E-36  |
| rs1491106  | 9  | 109483517 | T | G | 0.3764 | 0.0245  | 0.0025 | 2.81E-23  |
| rs10983184 | 9  | 119234058 | T | C | 0.6404 | 0.0273  | 0.0025 | 9.05E-28  |
| rs7024579  | 9  | 139100413 | T | C | 0.3154 | 0.008   | 0.0026 | 1.99E-03  |
| rs4073153  | 9  | 139259349 | A | G | 0.5613 | -0.0013 | 0.0024 | 6.07E-01  |
| rs7090277  | 10 | 12278021  | A | T | 0.5165 | 0.0409  | 0.0024 | 3.97E-67  |
| rs7914842  | 10 | 30268770  | A | G | 0.5787 | 0.0134  | 0.0024 | 2.70E-08  |
| rs7082066  | 10 | 64998971  | A | G | 0.1848 | 0.0087  | 0.0031 | 4.40E-03  |
| rs10998018 | 10 | 69962954  | A | G | 0.4965 | -0.0025 | 0.0024 | 2.94E-01  |
| rs7098573  | 10 | 75580014  | A | G | 0.7177 | -0.0173 | 0.0027 | 6.12E-11  |
| rs1259605  | 10 | 77119039  | T | C | 0.7515 | 0.0009  | 0.0028 | 7.49E-01  |
| rs2637254  | 10 | 78312002  | A | G | 0.5108 | -0.0188 | 0.0024 | 3.02E-15  |
| rs721917   | 10 | 81706324  | A | G | 0.5811 | 0.0193  | 0.0024 | 1.65E-15  |
| rs4279944  | 10 | 124297637 | T | C | 0.1514 | 0.0218  | 0.0034 | 2.18E-10  |
| rs17596617 | 11 | 43690717  | T | C | 0.3172 | 0.0002  | 0.0025 | 9.48E-01  |
| rs10838435 | 11 | 45244903  | C | G | 0.1439 | 0.0096  | 0.0034 | 4.45E-03  |
| rs71490394 | 11 | 62370155  | A | G | 0.3671 | 0.0108  | 0.0025 | 1.26E-05  |
| rs2027761  | 11 | 73036179  | T | C | 0.113  | 0.0369  | 0.0038 | 1.31E-22  |
| rs11234768 | 11 | 86448839  | T | C | 0.8458 | 0.0303  | 0.0033 | 5.07E-20  |

|             |    |           |   |   |        |         |        |           |
|-------------|----|-----------|---|---|--------|---------|--------|-----------|
| rs541601    | 11 | 126009500 | T | C | 0.1829 | -0.0241 | 0.0031 | 5.29E-15  |
| rs7977418   | 12 | 28588242  | T | C | 0.5415 | -0.0045 | 0.0024 | 5.67E-02  |
| rs1689510   | 12 | 56396768  | C | G | 0.3373 | -0.0145 | 0.0025 | 8.36E-09  |
| rs11172113  | 12 | 57527283  | T | C | 0.5889 | -0.0227 | 0.0024 | 7.04E-21  |
| rs12825748  | 12 | 65793153  | C | G | 0.3087 | 0.0039  | 0.0026 | 1.34E-01  |
| rs56390486  | 12 | 85719906  | A | G | 0.2905 | 0.0051  | 0.0026 | 5.10E-02  |
| rs9788269   | 12 | 94194890  | A | G | 0.7324 | 0.0016  | 0.0027 | 5.53E-01  |
| rs113745635 | 12 | 95554771  | T | C | 0.2163 | -0.0275 | 0.0029 | 2.36E-21  |
| rs7970544   | 12 | 96242109  | T | G | 0.1869 | 0.0439  | 0.0031 | 1.45E-46  |
| rs10850377  | 12 | 115201436 | A | G | 0.3408 | 0.0098  | 0.0025 | 1.07E-04  |
| rs35505     | 12 | 115501127 | A | G | 0.6861 | -0.0013 | 0.0026 | 6.11E-01  |
| rs35107139  | 14 | 54419106  | A | C | 0.5962 | 0.0315  | 0.0025 | 3.40E-36  |
| rs1756281   | 14 | 84338431  | A | G | 0.6987 | 0.0237  | 0.0026 | 1.38E-19  |
| rs11160037  | 14 | 92512143  | A | G | 0.6206 | -0.0079 | 0.0025 | 1.36E-03  |
| rs11621587  | 14 | 93098339  | C | G | 0.1821 | 0.0023  | 0.0031 | 4.56E-01  |
| rs2012453   | 15 | 41840238  | A | G | 0.4107 | 0.0239  | 0.0024 | 4.26E-23  |
| rs56383987  | 15 | 41953211  | T | C | 0.0549 | -0.0364 | 0.0053 | 7.08E-12  |
| rs12917612  | 15 | 67491274  | A | C | 0.2295 | 0.0141  | 0.0028 | 5.82E-07  |
| rs1441358   | 15 | 71612514  | T | G | 0.6642 | 0.0642  | 0.0025 | 4.12E-145 |
| rs62015883  | 15 | 71803450  | T | C | 0.1784 | -0.031  | 0.0031 | 1.22E-23  |
| rs1896797   | 15 | 84274591  | A | G | 0.4904 | 0.0292  | 0.0024 | 2.48E-34  |
| rs78442819  | 16 | 10740982  | C | G | 0.1997 | -0.0355 | 0.0031 | 2.25E-31  |
| rs12446589  | 16 | 28870962  | A | G | 0.3998 | -0.0059 | 0.0024 | 1.38E-02  |
| rs11648508  | 16 | 58063513  | T | G | 0.6832 | 0.0332  | 0.0026 | 9.86E-39  |
| rs8047194   | 16 | 69891510  | T | G | 0.4961 | -0.0028 | 0.0024 | 2.38E-01  |
| rs11858992  | 16 | 75411445  | A | C | 0.4037 | 0.038   | 0.0024 | 4.83E-55  |
| rs2345443   | 16 | 78225633  | A | G | 0.3114 | 0.011   | 0.0026 | 2.11E-05  |
| rs2244592   | 17 | 28072327  | A | G | 0.4526 | -0.0323 | 0.0024 | 4.60E-42  |
| rs62070648  | 17 | 29210595  | A | G | 0.27   | -0.0027 | 0.0027 | 3.05E-01  |
| rs35246838  | 17 | 36915540  | T | C | 0.8681 | 0.0386  | 0.0036 | 1.41E-27  |
| rs8069451   | 17 | 37504933  | T | C | 0.7494 | 0.0008  | 0.0027 | 7.69E-01  |
| rs79412431  | 17 | 43940021  | A | G | 0.2161 | -0.0108 | 0.0029 | 2.44E-04  |
| rs6501431   | 17 | 68976415  | T | C | 0.7843 | -0.0111 | 0.0029 | 1.32E-04  |

|            |    |          |   |   |        |         |        |           |
|------------|----|----------|---|---|--------|---------|--------|-----------|
| rs6501455  | 17 | 69201811 | A | G | 0.5015 | 0.0206  | 0.0024 | 5.68E-18  |
| rs9892893  | 17 | 73525670 | T | G | 0.2606 | 0.0124  | 0.0027 | 6.58E-06  |
| rs513953   | 18 | 8801351  | A | G | 0.2542 | -0.0255 | 0.0027 | 7.42E-21  |
| rs11082051 | 18 | 20234336 | A | G | 0.5298 | 0.006   | 0.0024 | 1.10E-02  |
| rs9947743  | 18 | 20708321 | A | G | 0.7867 | -0.006  | 0.0029 | 4.01E-02  |
| rs12607758 | 18 | 51022606 | T | C | 0.5932 | -0.0078 | 0.0024 | 1.24E-03  |
| rs9636166  | 19 | 31829613 | A | C | 0.8739 | 0.0355  | 0.0036 | 3.66E-23  |
| rs34093919 | 19 | 41117300 | A | G | 0.0128 | 0.1535  | 0.0106 | 1.69E-47  |
| rs2145272  | 20 | 6626218  | A | G | 0.6376 | -0.0087 | 0.0025 | 4.11E-04  |
| rs2236180  | 20 | 25282608 | T | C | 0.815  | 0.016   | 0.003  | 1.41E-07  |
| rs4413223  | 20 | 30858967 | A | G | 0.1722 | -0.0232 | 0.0031 | 1.30E-13  |
| rs143384   | 20 | 34025756 | A | G | 0.5964 | -0.0095 | 0.0024 | 9.19E-05  |
| rs12481092 | 20 | 45486817 | T | C | 0.2723 | -0.0022 | 0.0027 | 4.21E-01  |
| rs4809221  | 20 | 62372706 | A | G | 0.6753 | 0.0006  | 0.0026 | 8.04E-01  |
| rs62213732 | 21 | 35675966 | T | C | 0.6317 | 0.0246  | 0.0025 | 9.34E-24  |
| rs1978968  | 22 | 18448113 | T | C | 0.2367 | 0.0223  | 0.0028 | 1.25E-15  |
| rs9610955  | 22 | 20790723 | C | G | 0.1972 | -0.0269 | 0.003  | 2.69E-19  |
| rs2283847  | 22 | 28181399 | T | C | 0.5569 | -0.0219 | 0.0024 | 3.621E-19 |

---

Chr, Chromosome; BP, position (GRCh37); FreqRisk, allele frequency of risk allele; Beta, effect estimate; SE, standard error.

**Table S3. Participants baseline characteristics according to COPD status (n = 155,403).**

| Characteristics                                      | COPD status             |                   |
|------------------------------------------------------|-------------------------|-------------------|
|                                                      | No                      | Yes               |
| NO.                                                  | 152,485                 | 2,918             |
| <b>Demographics</b>                                  |                         |                   |
| Age (years)                                          | 55.3 (7.9) <sup>1</sup> | 60.4 (6.4)        |
| Sex (male, %)                                        | 44.4 <sup>2</sup>       | 52.6              |
| Education ( $\geq$ College graduate, %)              | 44.0                    | 25.6              |
| Townsend Deprivation Index                           | -1.6 (2.8)              | -0.9 (3.1)        |
| Household income ( $\geq$ £31,000, %)                | 56.6                    | 32.4              |
| Ethnicity (white, %)                                 | 90.8                    | 92.7              |
| <b>Lifestyle factors</b>                             |                         |                   |
| Smoking status                                       |                         |                   |
| Never                                                | 58.7                    | 23.4              |
| Previous                                             | 33.9                    | 49.8              |
| Current                                              | 7.4                     | 26.8              |
| Alcohol drinker status                               |                         |                   |
| Never                                                | 3.1                     | 3.0               |
| Previous                                             | 2.8                     | 4.9               |
| Current                                              | 94.0                    | 92.1              |
| Alcoholic beverages (g/d)                            | 154.2 (128.2)           | 196.8 (177.4)     |
| Seafood intake ( $\geq$ 1 servings/d, %)             | 0.4                     | 0.5               |
| Animal organs intake ( $\geq$ 1 servings/d, %)       | 1.2                     | 1.6               |
| Total energy intake (kcal/d)                         | 2116.5<br>(648.6)       | 2142.7<br>(690.2) |
| Regular physical activity ( $\geq$ 500 MET-min/week) | 72.9                    | 66.7              |
| Diet score                                           |                         |                   |
| 0                                                    | 0.7                     | 1.2               |
| 1                                                    | 4.0                     | 5.8               |
| 2                                                    | 11.8                    | 16.6              |

|                                         |              |              |
|-----------------------------------------|--------------|--------------|
| 3                                       | 22.4         | 23.6         |
| 4                                       | 28.0         | 26.0         |
| 5                                       | 22.7         | 18.1         |
| 6                                       | 9.5          | 7.8          |
| 7                                       | 1.0          | 0.9          |
| Diet score $\geq$ 4                     | 61.1         | 52.8         |
| <b>Clinical and laboratory measures</b> |              |              |
| Urate (umol/L)                          | 303.1 (78.2) | 323.8 (82.6) |
| FEV <sub>1</sub> (L)                    | 2.8 (0.76)   | 2.2 (0.7)    |
| FVC (L)                                 | 3.7 (1.0)    | 3.2 (0.9)    |
| FEV <sub>1</sub> /FVC                   | 0.7 (0.0)    | 0.7 (0.0)    |
| Height (cm)                             | 169.2 (9.1)  | 169.5 (9.1)  |
| Body mass index (kg/m <sup>2</sup> )    | 26.7 (4.5)   | 27.9 (5.3)   |
| Waist circumference (cm)                | 88.4 (13.0)  | 93.8 (14.3)  |
| Creatinine (umol/L)                     | 71.7 (15.9)  | 73.3 (25.6)  |
| Metabolic syndrome (yes, %)             | 22.0         | 35.1         |
| Asthma (yes, %)                         | 2.0          | 10.4         |
| Systemic inflammation Index             | 21.4 (10.4)  | 23.3 (12.5)  |
| <b>Family diseases history</b>          |              |              |
| Cardiovascular disease (yes, %)         | 55.0         | 60.1         |
| Hypertension (yes, %)                   | 49.5         | 42.7         |
| Diabetes (yes, %)                       | 20.8         | 20.2         |
| <b>Personal diseases history</b>        |              |              |
| Kidney disease (yes, %)                 | 1.6          | 2.0          |
| Hypertension (yes, %)                   | 21.3         | 35.2         |
| Diabetes (yes, %)                       | 3.3          | 7.6          |
| <b>Medication history</b>               |              |              |
| Antihypertensive drugs (yes, %)         | 8.0          | 17.3         |
| Lipid-lowering drugs (yes, %)           | 7.1          | 15.2         |
| Hypoglycemic drugs (yes, %)             | 0.4          | 1.0          |
| Urate-affecting drugs (yes, %)          | 0.8          | 1.8          |

---

<sup>1</sup> Mean (standard deviation) (all such values).

<sup>2</sup> Percentage (all such values).



**Table S4. Association between hyperuricemia and risk of COPD (n = 155,403).**

|                         | Serum urate levels |                          | <i>P</i> value <sup>1</sup> |
|-------------------------|--------------------|--------------------------|-----------------------------|
|                         | Normal             | Hyperuricemia            |                             |
| Number of participants  | 138,388            | 17,015                   |                             |
| Number of incident COPD | 2,446              | 472                      |                             |
| Person-years            | 1,256,168          | 153,801                  |                             |
| Model 1 <sup>2</sup>    | Reference          | <b>1.53 (1.38, 1.68)</b> | <b>&lt;0.0001</b>           |
| Model 2 <sup>4</sup>    | Reference          | <b>1.25 (1.13, 1.38)</b> | <b>&lt;0.0001</b>           |
| Model 3 <sup>5</sup>    | Reference          | <b>1.14 (1.02, 1.26)</b> | <b>0.01</b>                 |
| Model 4 <sup>6</sup>    | Reference          | <b>1.11 (1.00, 1.24)</b> | <b>0.03</b>                 |

Abbreviations: SU, serum urate; SD, standard deviation; COPD, chronic obstructive pulmonary disease.

<sup>1</sup> Analysis by Cox proportional hazards regression models.

<sup>2</sup> Crude model.

<sup>3</sup> Hazard ratios (95% confidence interval) (all such values).

<sup>4</sup> Adjusted for age, sex, and BMI.

<sup>5</sup> Additionally adjusted for height, household income, education levels, physical activity, Townsend deprivation index, physical activity, baseline metabolic syndrome, family history of diseases (hypertension, cardiovascular disease, and diabetes), and baseline FEV1/FVC ratio.

<sup>6</sup> Additionally adjusted for smoking status, drinking status, diet score, baseline asthma, SII, ethnicity, creatinine, seafood and animal organs intake, alcoholic beverages, medication history (including antihypertensive drugs, lipid-lowering drugs, hypoglycemic drugs, allopurinol, and diuretics), and personal history of diseases (hypertension, diabetes, and kidney disease).

**Table S5. Hazards ratios (HRs) and 95% confidence interval (CIs) of COPD by joint effect of SU levels and diet score after excluding COPD occurred within first 3 years of follow up (n = 154,990).**

| Joint effect       |            | Number of participants | Number of incident COPD | Model 1 <sup>1</sup>                  | Model 2 <sup>2</sup>     | Model 3 <sup>3</sup>     | Model 4 <sup>4</sup>     |
|--------------------|------------|------------------------|-------------------------|---------------------------------------|--------------------------|--------------------------|--------------------------|
| Serum urate levels | Diet score |                        |                         |                                       |                          |                          |                          |
| Hyperuricemia      | <4         | 7,991                  | 209                     | Reference                             | Reference                | Reference                | Reference                |
| Hyperuricemia      | ≥4         | 8,958                  | 197                     | <b>0.80 (0.66, 0.97)</b> <sup>5</sup> | <b>0.72 (0.59, 0.88)</b> | 0.84 (0.69, 1.03)        | 0.83 (0.68, 1.01)        |
| Normal             | <4         | 52,452                 | 968                     | <b>0.71 (0.61, 0.83)</b>              | <b>0.84 (0.72, 0.97)</b> | 0.93 (0.80, 1.09)        | 0.90 (0.77, 1.06)        |
| Normal             | ≥4         | 85,589                 | 1,131                   | <b>0.50 (0.43, 0.58)</b>              | <b>0.56 (0.48, 0.66)</b> | <b>0.70 (0.60, 0.82)</b> | <b>0.74 (0.63, 0.86)</b> |

Abbreviations: SU, serum urate; COPD, chronic obstructive pulmonary disease.

<sup>1</sup> Crude model.

<sup>2</sup> Adjusted for age, sex, and BMI.

<sup>3</sup> Additionally adjusted for height, household income, education levels, physical activity, Townsend deprivation index, baseline metabolic syndrome, family history of diseases (hypertension, cardiovascular disease, and diabetes), and baseline FEV1/FVC ratio.

<sup>4</sup> Additionally adjusted for smoking status, alcohol consumption, baseline asthma, SII, ethnicity, creatinine, seafood and animal organs intake, alcoholic beverages, medication history (including antihypertensive drugs, lipid-lowering drugs, hypoglycemic drugs, allopurinol, and diuretics), and personal history of diseases (hypertension, diabetes, and kidney disease).

<sup>5</sup> Hazard ratios (95% confidence interval) (all such values).

**Table S6. Association between genetic risk and the risk of COPD (n = 153,620).**

|                         | Genetic risk    |                                       |                          | <i>P</i> for trend <sup>1</sup> |
|-------------------------|-----------------|---------------------------------------|--------------------------|---------------------------------|
|                         | Low (tertile 1) | Middle (tertile 2)                    | High (tertile 3)         |                                 |
| Number of participants  | 51,155          | 51,155                                | 51,310                   |                                 |
| Number of incident COPD | 840             | 955                                   | 1,091                    |                                 |
| Person-years            | 464,667         | 464,522                               | 465,405                  |                                 |
| Model 1 <sup>2</sup>    | Reference       | <b>1.14 (1.04, 1.25)</b> <sup>3</sup> | <b>1.30 (1.19, 1.42)</b> | <b>&lt;0.0001</b>               |
| Model 2 <sup>4</sup>    | Reference       | <b>1.13 (1.03, 1.24)</b>              | <b>1.3 (1.18, 1.42)</b>  | <b>&lt;0.0001</b>               |
| Model 3 <sup>5</sup>    | Reference       | <b>1.14 (1.03, 1.25)</b>              | <b>1.31 (1.19, 1.43)</b> | <b>&lt;0.0001</b>               |
| Model 4 <sup>6</sup>    | Reference       | <b>1.12 (1.02, 1.23)</b>              | <b>1.27 (1.16, 1.39)</b> | <b>&lt;0.0001</b>               |

Abbreviation: COPD, chronic obstructive pulmonary disease.

<sup>1</sup> Analysis by Cox proportional hazards regression models.

<sup>2</sup> Crude model.

<sup>3</sup> Hazard ratios (95% confidence interval) (all such values).

<sup>4</sup> Adjusted for age, sex, and BMI.

<sup>5</sup> Additionally adjusted for height, household income, education levels, physical activity, Townsend deprivation index, physical activity, baseline metabolic syndrome, and family history of diseases (hypertension, cardiovascular disease, and diabetes).

<sup>6</sup> Additionally adjusted for smoking status, drinking status, diet score, baseline asthma, SII, ethnicity, creatinine, seafood and animal organs intake, alcoholic beverages, medication history (including antihypertensive drugs, lipid-lowering drugs, hypoglycemic drugs, allopurinol, and

diuretics), and personal history of diseases (hypertension, diabetes, and kidney disease), first 10 genetic principal components, and genotype measurement batch.

**Table S7. Hazards ratios (HRs) and 95% confidence interval (CIs) of COPD by joint effect of SU levels and diet score in subgroup analyses.**

| Subgroups | Joint effect       |            | Number of participants | Number of incident COPD | Model 1 <sup>1</sup>     | Model 2 <sup>2</sup>     | Model 3 <sup>3</sup>     | Model 4 <sup>4</sup>     |
|-----------|--------------------|------------|------------------------|-------------------------|--------------------------|--------------------------|--------------------------|--------------------------|
|           | Serum urate levels | Diet score |                        |                         |                          |                          |                          |                          |
| Men       |                    |            |                        |                         |                          |                          |                          |                          |
|           | Hyperuricemia      | <4         | 5,819                  | 174                     | Reference                | Reference                | Reference                | Reference                |
|           | Hyperuricemia      | ≥4         | 4,939                  | 126                     | 0.82 (0.65, 1.03)        | <b>0.73 (0.58, 0.92)</b> | 0.86 (0.68, 1.08)        | 0.84 (0.66, 1.06)        |
|           | Normal             | <4         | 27,878                 | 697                     | 0.85 (0.72, 1.00)        | 0.88 (0.74, 1.04)        | 1.01 (0.85, 1.19)        | 1.00 (0.84, 1.19)        |
|           | Normal             | ≥4         | 30,668                 | 539                     | <b>0.58 (0.49, 0.69)</b> | <b>0.56 (0.47, 0.67)</b> | <b>0.72 (0.61, 0.86)</b> | <b>0.78 (0.65, 0.93)</b> |
| Women     |                    |            |                        |                         |                          |                          |                          |                          |
|           | Hyperuricemia      | <4         | 2,206                  | 69                      | Reference                | Reference                | Reference                | Reference                |
|           | Hyperuricemia      | ≥4         | 4,051                  | 103                     | 0.74 (0.54, 1.00)        | <b>0.68 (0.50, 0.92)</b> | 0.79 (0.58, 1.08)        | 0.82 (0.60, 1.11)        |
|           | Normal             | <4         | 24,741                 | 438                     | <b>0.54 (0.42, 0.70)</b> | <b>0.74 (0.57, 0.96)</b> | 0.80 (0.62, 1.03)        | 0.79 (0.61, 1.03)        |
|           | Normal             | ≥4         | 55,101                 | 772                     | <b>0.42 (0.33, 0.54)</b> | <b>0.52 (0.40, 0.67)</b> | <b>0.63 (0.49, 0.81)</b> | <b>0.69 (0.53, 0.89)</b> |
| Age<60    |                    |            |                        |                         |                          |                          |                          |                          |
|           | Hyperuricemia      | <4         | 4,900                  | 78                      | Reference                | Reference                | Reference                | Reference                |
|           | Hyperuricemia      | ≥4         | 4,684                  | 60                      | 0.77 (0.55, 1.09)        | 0.72 (0.51, 1.02)        | 0.85 (0.60, 1.19)        | 0.80 (0.57, 1.12)        |
|           | Normal             | <4         | 35,273                 | 431                     | <b>0.77 (0.60, 0.98)</b> | 0.87 (0.68, 1.12)        | 1.00 (0.78, 1.28)        | 0.95 (0.74, 1.22)        |

|                  |               |          |        |     |                          |                          |                          |                          |
|------------------|---------------|----------|--------|-----|--------------------------|--------------------------|--------------------------|--------------------------|
| Age $\geq$ 60    | Normal        | $\geq$ 4 | 52,998 | 447 | <b>0.52 (0.41, 0.66)</b> | <b>0.57 (0.44, 0.73)</b> | <b>0.74 (0.57, 0.95)</b> | 0.77 (0.60, 1.00)        |
|                  | Hyperuricemia | <4       | 3,125  | 165 | Reference                | Reference                | Reference                | Reference                |
|                  | Hyperuricemia | $\geq$ 4 | 4,306  | 169 | <b>0.71 (0.57, 0.88)</b> | <b>0.73 (0.59, 0.91)</b> | 0.86 (0.69, 1.07)        | 0.87 (0.70, 1.08)        |
|                  | Normal        | <4       | 17,346 | 704 | <b>0.77 (0.65, 0.91)</b> | <b>0.81 (0.69, 0.97)</b> | 0.91 (0.76, 1.08)        | 0.91 (0.76, 1.08)        |
| BMI<25           | Normal        | $\geq$ 4 | 32,771 | 864 | <b>0.50 (0.42, 0.59)</b> | <b>0.55 (0.46, 0.65)</b> | <b>0.69 (0.58, 0.82)</b> | <b>0.74 (0.62, 0.88)</b> |
|                  | Hyperuricemia | <4       | 786    | 25  | Reference                | Reference                | Reference                | Reference                |
|                  | Hyperuricemia | $\geq$ 4 | 1,160  | 30  | 0.76 (0.44, 1.29)        | 0.72 (0.42, 1.22)        | 1.01 (0.59, 1.73)        | 1.09 (0.63, 1.86)        |
|                  | Normal        | <4       | 19,149 | 377 | <b>0.63 (0.42, 0.95)</b> | 0.85 (0.56, 1.28)        | 0.95 (0.63, 1.43)        | 0.82 (0.54, 1.26)        |
| BMI $\geq$ 25    | Normal        | $\geq$ 4 | 38,708 | 477 | <b>0.39 (0.26, 0.59)</b> | <b>0.49 (0.32, 0.74)</b> | <b>0.63 (0.41, 0.94)</b> | 0.67 (0.44, 1.02)        |
|                  | Hyperuricemia | <4       | 7,239  | 218 | Reference                | Reference                | Reference                | Reference                |
|                  | Hyperuricemia | $\geq$ 4 | 7,830  | 199 | <b>0.81 (0.67, 0.98)</b> | <b>0.73 (0.60, 0.88)</b> | 0.83 (0.68, 1.01)        | <b>0.81 (0.67, 0.99)</b> |
|                  | Normal        | <4       | 33,470 | 758 | <b>0.76 (0.65, 0.89)</b> | <b>0.82 (0.70, 0.95)</b> | 0.92 (0.79, 1.07)        | 0.93 (0.80, 1.09)        |
| Low genetic risk | Normal        | $\geq$ 4 | 47,061 | 834 | <b>0.58 (0.50, 0.68)</b> | <b>0.59 (0.50, 0.68)</b> | <b>0.73 (0.63, 0.86)</b> | <b>0.77 (0.66, 0.90)</b> |
|                  | Hyperuricemia | <4       | 2,670  | 77  | Reference                | Reference                | Reference                | Reference                |
|                  | Hyperuricemia | $\geq$ 4 | 2,979  | 83  | 0.89 (0.65, 1.21)        | 0.81 (0.59, 1.11)        | 0.88 (0.64, 1.20)        | 0.83 (0.61, 1.14)        |
|                  | Normal        | <4       | 17,303 | 313 | <b>0.62 (0.48, 0.80)</b> | <b>0.73 (0.57, 0.94)</b> | 0.81 (0.63, 1.05)        | <b>0.77 (0.59, 0.99)</b> |

|                     |    |        |     |                          |                          |                          |                          |
|---------------------|----|--------|-----|--------------------------|--------------------------|--------------------------|--------------------------|
| Normal              | ≥4 | 28,203 | 367 | <b>0.44 (0.34, 0.56)</b> | <b>0.50 (0.39, 0.64)</b> | <b>0.59 (0.46, 0.77)</b> | <b>0.61 (0.47, 0.79)</b> |
| Middle genetic risk |    |        |     |                          |                          |                          |                          |
| Hyperuricemia       | <4 | 2,616  | 74  | Reference                | Reference                | Reference                | Reference                |
| Hyperuricemia       | ≥4 | 2,972  | 63  | 0.74 (0.52, 1.03)        | <b>0.65 (0.47, 0.92)</b> | <b>0.71 (0.50, 0.99)</b> | 0.75 (0.53, 1.06)        |
| Normal              | <4 | 17,392 | 384 | 0.79 (0.61, 1.01)        | 0.92 (0.71, 1.18)        | 0.99 (0.77, 1.28)        | 0.96 (0.74, 1.24)        |
| Normal              | ≥4 | 28,175 | 434 | <b>0.54 (0.42, 0.70)</b> | <b>0.60 (0.46, 0.77)</b> | <b>0.70 (0.54, 0.90)</b> | <b>0.75 (0.58, 0.98)</b> |
| High genetic risk   |    |        |     |                          |                          |                          |                          |
| Hyperuricemia       | <4 | 2,663  | 88  | Reference                | Reference                | Reference                | Reference                |
| Hyperuricemia       | ≥4 | 2,947  | 81  | 0.80 (0.59, 1.09)        | <b>0.73 (0.54, 0.99)</b> | 0.83 (0.61, 1.13)        | 0.83 (0.61, 1.13)        |
| Normal              | <4 | 17,307 | 427 | <b>0.76 (0.60, 0.96)</b> | 0.90 (0.71, 1.14)        | 1.04 (0.82, 1.31)        | 1.03 (0.81, 1.32)        |
| Normal              | ≥4 | 28,393 | 495 | <b>0.52 (0.42, 0.66)</b> | <b>0.59 (0.47, 0.75)</b> | <b>0.74 (0.58, 0.94)</b> | 0.78 (0.61, 1.00)        |
| Never smoking       |    |        |     |                          |                          |                          |                          |
| Hyperuricemia       | <4 | 3,980  | 38  | Reference                | Reference                | Reference                | Reference                |
| Hyperuricemia       | ≥4 | 4,662  | 59  | 1.28 (0.85, 1.93)        | 1.10 (0.73, 1.66)        | 1.20 (0.80, 1.81)        | 1.16 (0.77, 1.76)        |
| Normal              | <4 | 30,197 | 204 | 0.72 (0.51, 1.02)        | 0.82 (0.58, 1.16)        | 0.87 (0.61, 1.23)        | 0.89 (0.62, 1.28)        |
| Normal              | ≥4 | 51,391 | 382 | 0.78 (0.55, 1.09)        | 0.82 (0.58, 1.15)        | 0.92 (0.65, 1.29)        | 0.93 (0.65, 1.32)        |
| Previous smoker     |    |        |     |                          |                          |                          |                          |
| Hyperuricemia       | <4 | 3,326  | 150 | Reference                | Reference                | Reference                | Reference                |
| Hyperuricemia       | ≥4 | 3,820  | 146 | <b>0.78 (0.62, 0.98)</b> | <b>0.74 (0.58, 0.93)</b> | 0.84 (0.67, 1.06)        | 0.83 (0.66, 1.04)        |
| Normal              | <4 | 16,894 | 512 | <b>0.66 (0.55, 0.79)</b> | <b>0.77 (0.64, 0.92)</b> | 0.90 (0.75, 1.08)        | 0.91 (0.75, 1.10)        |

|                |    |        |     |                         |                          |                          |                          |
|----------------|----|--------|-----|-------------------------|--------------------------|--------------------------|--------------------------|
| Normal         | ≥4 | 29,143 | 644 | <b>0.47 (0.4, 0.57)</b> | <b>0.56 (0.46, 0.67)</b> | <b>0.69 (0.57, 0.83)</b> | <b>0.69 (0.57, 0.83)</b> |
| Current smoker |    |        |     |                         |                          |                          |                          |
| Hyperuricemia  | <4 | 719    | 55  | Reference               | Reference                | Reference                | Reference                |
| Hyperuricemia  | ≥4 | 508    | 24  | 0.63 (0.39, 1.02)       | <b>0.55 (0.34, 0.89)</b> | <b>0.54 (0.33, 0.87)</b> | <b>0.50 (0.31, 0.82)</b> |
| Normal         | <4 | 5,528  | 419 | 1.05 (0.79, 1.40)       | 1.11 (0.83, 1.48)        | 1.02 (0.76, 1.36)        | 1.02 (0.76, 1.37)        |
| Normal         | ≥4 | 5,235  | 285 | 0.75 (0.56, 1.00)       | <b>0.72 (0.54, 0.98)</b> | 0.80 (0.59, 1.08)        | 0.80 (0.59, 1.08)        |

Abbreviations: SU, serum urate; COPD, chronic obstructive pulmonary disease.

<sup>1</sup> Crude model.

<sup>2</sup> Adjusted for age, sex, and BMI.

<sup>3</sup> Additionally adjusted for height, household income, education levels, physical activity, Townsend deprivation index, baseline metabolic syndrome, family history of diseases (hypertension, cardiovascular disease, and diabetes), and baseline FEV1/FVC ratio.

<sup>4</sup> Additionally adjusted for smoking status, alcohol consumption, baseline asthma, SII, ethnicity, creatinine, seafood and animal organs intake, alcoholic beverages, medication history (including antihypertensive drugs, lipid-lowering drugs, hypoglycemic drugs, allopurinol, and diuretics), and personal history of diseases (hypertension, diabetes, and kidney disease).

<sup>5</sup> Hazard ratios (95% confidence interval) (all such values).



**Table S8. Hazards ratios (HRs) and 95% confidence interval (CIs) of COPD by joint exposures of SU levels and diet score: results from competing risk regression model (n = 155,403).**

| Joint effect       |            | Number of participants | Number of incident COPD | Model 1 <sup>1</sup>                  | Model 2 <sup>2</sup>     | Model 3 <sup>3</sup>     | Model 4 <sup>4</sup>     |
|--------------------|------------|------------------------|-------------------------|---------------------------------------|--------------------------|--------------------------|--------------------------|
| Serum urate levels | Diet score |                        |                         |                                       |                          |                          |                          |
| Hyperuricemia      | <4         | 8,025                  | 243                     | Reference                             | Reference                | Reference                | Reference                |
| Hyperuricemia      | ≥4         | 8,990                  | 229                     | <b>0.82 (0.68, 0.98)</b> <sup>5</sup> | <b>0.74 (0.62, 0.89)</b> | 0.87 (0.72, 1.04)        | 0.86 (0.71, 1.03)        |
| Normal             | <4         | 52,619                 | 1,135                   | <b>0.73 (0.63, 0.83)</b>              | <b>0.85 (0.74, 0.98)</b> | <b>0.95 (0.82, 1.10)</b> | 0.92 (0.80, 1.07)        |
| Normal             | ≥4         | 85,769                 | 1,311                   | <b>0.51 (0.44, 0.58)</b>              | <b>0.56 (0.49, 0.65)</b> | <b>0.71 (0.61, 0.82)</b> | <b>0.75 (0.64, 0.87)</b> |

Abbreviations: SU, serum urate; COPD, chronic obstructive pulmonary disease.

<sup>1</sup> Crude model.

<sup>2</sup> Adjusted for age, sex, and BMI.

<sup>3</sup> Additionally adjusted for height, household income, education levels, physical activity, Townsend deprivation index, baseline metabolic syndrome, family history of diseases (hypertension, cardiovascular disease, and diabetes), and baseline FEV1/FVC ratio.

<sup>4</sup> Additionally adjusted for smoking status, alcohol consumption, baseline asthma, SII, ethnicity, creatinine, seafood and animal organs intake, alcoholic beverages, medication history (including antihypertensive drugs, lipid-lowering drugs, hypoglycemic drugs, allopurinol, and diuretics), and personal history of diseases (hypertension, diabetes, and kidney disease).

<sup>5</sup> Hazard ratios (95% confidence interval) (all such values).

**Table S9. Association between weighted diet score and risk of COPD (n = 155,403).**

|                                  | Tertiles of weighted lifestyle score |                                       |                          | <i>P</i> for trend <sup>1</sup> |
|----------------------------------|--------------------------------------|---------------------------------------|--------------------------|---------------------------------|
|                                  | Tertile 1                            | Tertile 2                             | Tertile 3                |                                 |
| Weighted lifestyle score: median | 24.7                                 | 51.4                                  | 73.3                     |                                 |
| Number of participants           | 52,803                               | 57,262                                | 45,338                   |                                 |
| Number of incident COPD          | 2,975                                | 2,198                                 | 1,176                    |                                 |
| Person-years                     | 297,500                              | 219,800                               | 117,600                  |                                 |
| Model 1 <sup>2</sup>             | Reference                            | <b>0.72 (0.66, 0.78)</b> <sup>3</sup> | <b>0.57 (0.52, 0.63)</b> | <b>&lt;0.0001</b>               |
| Model 2 <sup>4</sup>             | Reference                            | <b>0.68 (0.62, 0.74)</b>              | <b>0.54 (0.49, 0.60)</b> | <b>&lt;0.0001</b>               |
| Model 3 <sup>5</sup>             | Reference                            | <b>0.76 (0.70, 0.82)</b>              | <b>0.63 (0.57, 0.70)</b> | <b>&lt;0.0001</b>               |
| Model 4 <sup>6</sup>             | Reference                            | <b>0.82 (0.75, 0.89)</b>              | <b>0.70 (0.64, 0.78)</b> | <b>&lt;0.0001</b>               |

Abbreviation: COPD, chronic obstructive pulmonary disease.

<sup>1</sup> Analysis by Cox proportional hazards regression models.

<sup>2</sup> Crude model.

<sup>3</sup> Hazard ratios (95% confidence interval) (all such values).

<sup>4</sup> Adjusted for age, sex, and BMI.

<sup>5</sup> Additionally adjusted for height, household income, education levels, physical activity, Townsend deprivation index, physical activity, baseline metabolic syndrome, family history of diseases (hypertension, cardiovascular disease, and diabetes), and baseline FEV1/FVC ratio.

<sup>6</sup> Additionally adjusted for smoking status, alcohol consumption, baseline asthma, SII, ethnicity, creatinine, seafood and animal organs intake, alcoholic beverages, medication history (including antihypertensive drugs, lipid-lowering drugs, hypoglycemic drugs, allopurinol, and diuretics), personal history of diseases (hypertension, diabetes, and kidney disease), total energy intake, and serum urate.

**Table S10. Hazards ratios (HRs) and 95% confidence interval (CIs) of COPD by joint exposures of SU levels and weighted diet score (n = 155,403).**

| Joint effect       | Weighted   | Number of    | Number of     | Model 1 <sup>1</sup>                  | Model 2 <sup>2</sup>     | Model 3 <sup>3</sup>     | Model 4 <sup>4</sup>     |
|--------------------|------------|--------------|---------------|---------------------------------------|--------------------------|--------------------------|--------------------------|
| Serum urate levels | diet score | participants | incident COPD |                                       |                          |                          |                          |
| Hyperuricemia      | Tertile 1  | 7,290        | 224           | Reference                             | Reference                | Reference                | Reference                |
| Hyperuricemia      | Tertile 2  | 6,059        | 166           | <b>0.86 (0.70, 1.05)</b> <sup>5</sup> | <b>0.79 (0.65, 0.97)</b> | 0.94 (0.77, 1.15)        | 0.88 (0.72, 1.07)        |
| Hyperuricemia      | Tertile 3  | 3,666        | 82            | <b>0.71 (0.55, 0.91)</b>              | <b>0.64 (0.49, 0.82)</b> | <b>0.76 (0.59, 0.98)</b> | <b>0.77 (0.59, 0.99)</b> |
| Normal             | Tertile 1  | 45,513       | 1,043         | <b>0.76 (0.66, 0.88)</b>              | 0.90 (0.78, 1.04)        | 1.01 (0.88, 1.18)        | 0.95 (0.82, 1.11)        |
| Normal             | Tertile 2  | 51,203       | 845           | <b>0.54 (0.46, 0.62)</b>              | <b>0.60 (0.51, 0.69)</b> | <b>0.74 (0.64, 0.86)</b> | <b>0.78 (0.66, 0.91)</b> |
| Normal             | Tertile 3  | 41,672       | 558           | <b>0.43 (0.37, 0.50)</b>              | <b>0.48 (0.41, 0.56)</b> | <b>0.62 (0.53, 0.73)</b> | <b>0.66 (0.56, 0.78)</b> |

Abbreviations: SU, serum urate; COPD, chronic obstructive pulmonary disease.

<sup>1</sup> Crude model.

<sup>2</sup> Adjusted for age, sex, and BMI.

<sup>3</sup> Additionally adjusted for height, household income, education levels, physical activity, Townsend deprivation index, baseline metabolic syndrome, family history of diseases (hypertension, cardiovascular disease, and diabetes), and baseline FEV1/FVC ratio.

<sup>4</sup> Additionally adjusted for smoking status, alcohol consumption, baseline asthma, SII, ethnicity, creatinine, seafood and animal organs intake, alcoholic beverages, medication history (including antihypertensive drugs, lipid-lowering drugs, hypoglycemic drugs, allopurinol, and diuretics), and personal history of diseases (hypertension, diabetes, and kidney disease).

<sup>5</sup> Hazard ratios (95% confidence interval) (all such values).

**Table S11. Hazards ratios (HRs) and 95% confidence interval (CIs) of COPD by joint effect of SU levels and diet score additionally adjusted for baseline estimated glomerular filtration rate.**

| Joint effect       |            | Number of participants | Number of incident COPD | Model 1 <sup>1</sup>                  | Model 2 <sup>2</sup>     | Model 3 <sup>3</sup>     | Model 4 <sup>4</sup>     |
|--------------------|------------|------------------------|-------------------------|---------------------------------------|--------------------------|--------------------------|--------------------------|
| Serum urate levels | Diet score |                        |                         |                                       |                          |                          |                          |
| Hyperuricemia      | <4         | 8,025                  | 243                     | Reference                             | Reference                | Reference                | Reference                |
| Hyperuricemia      | ≥4         | 8,990                  | 229                     | <b>0.80 (0.67, 0.96)</b> <sup>5</sup> | <b>0.73 (0.61, 0.87)</b> | 0.85 (0.71, 1.02)        | 0.84 (0.70, 1.01)        |
| Normal             | <4         | 52,619                 | 1,135                   | <b>0.72 (0.62, 0.82)</b>              | <b>0.84 (0.73, 0.97)</b> | 0.94 (0.82, 1.08)        | 0.90 (0.78, 1.04)        |
| Normal             | ≥4         | 85,769                 | 1,311                   | <b>0.50 (0.44, 0.57)</b>              | <b>0.56 (0.49, 0.64)</b> | <b>0.70 (0.61, 0.81)</b> | <b>0.73 (0.63, 0.84)</b> |

Abbreviations: SU, serum urate; COPD, chronic obstructive pulmonary disease.

<sup>1</sup> Crude model.

<sup>2</sup> Adjusted for age, sex, and BMI.

<sup>3</sup> Additionally adjusted for height, household income, education levels, physical activity, Townsend deprivation index, baseline metabolic syndrome, family history of diseases (hypertension, cardiovascular disease, and diabetes), and baseline FEV1/FVC ratio.

<sup>4</sup> Additionally adjusted for smoking status, alcohol consumption, baseline asthma, SII, ethnicity, creatinine, seafood and animal organs intake, alcoholic beverages, medication history (including antihypertensive drugs, lipid-lowering drugs, hypoglycemic drugs, allopurinol, and diuretics), personal history of diseases (hypertension, diabetes, and kidney disease), and baseline estimated glomerular filtration rate.

<sup>5</sup> Hazard ratios (95% confidence interval) (all such values).

**Table S12. Association between SU levels and risk of COPD after excluding baseline FEV1/FVC<0.7 (n = 132,192).**

|                         | Uric acid levels |                                       |                          |                            | <i>P</i> for trend <sup>1</sup> |
|-------------------------|------------------|---------------------------------------|--------------------------|----------------------------|---------------------------------|
|                         | Level 1          | Level 2                               | Level 3                  | Level 4<br>(hyperuricemia) |                                 |
| Number of participants  | 38,965           | 39,221                                | 39,579                   | 14,427                     |                                 |
| Number of incident COPD | 315              | 369                                   | 511                      | 250                        |                                 |
| Person-years            | 355,372          | 356,893                               | 359,334                  | 130,854                    |                                 |
| Model 1 <sup>2</sup>    | Reference        | <b>1.17 (1.01, 1.36)</b> <sup>3</sup> | <b>1.61 (1.39, 1.85)</b> | <b>2.10 (1.78, 2.48)</b>   | <b>&lt;0.0001</b>               |
| Model 2 <sup>4</sup>    | Reference        | <b>1.04 (0.90, 1.21)</b>              | <b>1.28 (1.11, 1.48)</b> | <b>1.52 (1.28, 1.80)</b>   | <b>&lt;0.0001</b>               |
| Model 3 <sup>5</sup>    | Reference        | <b>1.04 (0.89, 1.21)</b>              | <b>1.25 (1.08, 1.45)</b> | <b>1.34 (1.13, 1.60)</b>   | <b>&lt;0.0001</b>               |
| Model 4 <sup>6</sup>    | Reference        | <b>1.08 (0.93, 1.26)</b>              | <b>1.30 (1.12, 1.51)</b> | <b>1.32 (1.10, 1.59)</b>   | <b>0.0001</b>                   |

Abbreviations: SD, standard deviation; COPD, chronic obstructive pulmonary disease.

<sup>1</sup> Analysis by Cox proportional hazards regression models.

<sup>2</sup> Crude model.

<sup>3</sup> Hazard ratios (95% confidence interval) (all such values).

<sup>4</sup> Adjusted for age, sex, and BMI.

<sup>5</sup> Additionally adjusted for height, household income, education levels, physical activity, Townsend deprivation index, physical activity, baseline metabolic syndrome, family history of diseases (hypertension, cardiovascular disease, and diabetes), and baseline FEV1/FVC ratio.

<sup>6</sup> Additionally adjusted for smoking status, drinking status, diet score, baseline asthma, SII, ethnicity, creatinine, seafood and animal organs intake, alcoholic beverages, medication history (including antihypertensive drugs, lipid-lowering drugs, hypoglycemic drugs, allopurinol, and diuretics), and personal history of diseases (hypertension, diabetes, and kidney disease).

**Table S13. Hazards ratios (HRs) and 95% confidence interval (CIs) of COPD by joint effect of SU levels and diet score after excluding participants diagnosed with diabetes, hypertension, and kidney disease at baseline (n = 118,185).**

| Joint effect       |            | Number of participants | Number of incident COPD | Model 1 <sup>1</sup>           | Model 2 <sup>2</sup>     | Model 3 <sup>3</sup>     | Model 4 <sup>4</sup>     |
|--------------------|------------|------------------------|-------------------------|--------------------------------|--------------------------|--------------------------|--------------------------|
| Serum urate levels | Diet score |                        |                         |                                |                          |                          |                          |
| Hyperuricemia      | <4         | 4,638                  | 97                      | Reference                      | Reference                | Reference                | Reference                |
| Hyperuricemia      | ≥4         | 4,984                  | 95                      | 0.86 (0.64, 1.14) <sup>5</sup> | 0.77 (0.58, 1.02)        | 0.91 (0.68, 1.21)        | 0.89 (0.66, 1.18)        |
| Normal             | <4         | 41,023                 | 736                     | 0.84 (0.68, 1.04)              | 0.97 (0.78, 1.21)        | 1.04 (0.83, 1.29)        | 0.90 (0.72, 1.12)        |
| Normal             | ≥4         | 67,540                 | 861                     | <b>0.59 (0.48, 0.73)</b>       | <b>0.65 (0.52, 0.81)</b> | <b>0.76 (0.61, 0.95)</b> | <b>0.74 (0.59, 0.92)</b> |

Abbreviations: SU, serum urate; COPD, chronic obstructive pulmonary disease.

<sup>1</sup> Crude model.

<sup>2</sup> Adjusted for age, sex, and BMI.

<sup>3</sup> Additionally adjusted for height, household income, education levels, physical activity, Townsend deprivation index, baseline metabolic syndrome, family history of diseases (hypertension, cardiovascular disease, and diabetes), and baseline FEV1/FVC ratio.

<sup>4</sup> Additionally adjusted for smoking status, alcohol consumption, baseline asthma, SII, ethnicity, creatinine, seafood and animal organs intake, alcoholic beverages, and medication history (including antihypertensive drugs, lipid-lowering drugs, hypoglycemic drugs, allopurinol, and diuretics).

<sup>5</sup> Hazard ratios (95% confidence interval) (all such values).



**Table S14. Associations between Mediterranean diet score (MDS) and risk of COPD (n = 155,403).**

|                       | Number of participants | Number of incident COPD | Model 1 <sup>1</sup>                  | Model 2 <sup>2</sup>     | Model 3 <sup>3</sup>     | Model 4 <sup>4</sup>     |
|-----------------------|------------------------|-------------------------|---------------------------------------|--------------------------|--------------------------|--------------------------|
| <b>MDS</b>            |                        |                         |                                       |                          |                          |                          |
| 0-3                   | 28,864                 | 780                     | Reference                             | Reference                | Reference                | Reference                |
| ≥3-5                  | 63,881                 | 1,270                   | <b>0.72 (0.66, 0.78) <sup>5</sup></b> | <b>0.69 (0.63, 0.75)</b> | <b>0.76 (0.69, 0.83)</b> | <b>0.83 (0.76, 0.91)</b> |
| ≥5                    | 62,658                 | 868                     | <b>0.49 (0.45, 0.54)</b>              | <b>0.46 (0.42, 0.51)</b> | <b>0.58 (0.52, 0.64)</b> | <b>0.67 (0.60, 0.74)</b> |
| <b>Diet factors</b>   |                        |                         |                                       |                          |                          |                          |
| <b>Vegetables</b>     |                        |                         |                                       |                          |                          |                          |
| <median               | 77,886                 | 1,537                   | Reference                             | Reference                | Reference                | Reference                |
| ≥median               | 77,517                 | 1,381                   | <b>0.90 (0.84, 0.97)</b>              | <b>0.80 (0.74, 0.86)</b> | <b>0.87 (0.81, 0.93)</b> | <b>0.90 (0.83, 0.97)</b> |
| <b>Legumes</b>        |                        |                         |                                       |                          |                          |                          |
| <median               | 105,273                | 2,022                   | Reference                             | Reference                | Reference                | Reference                |
| ≥median               | 50,130                 | 896                     | <b>0.91 (0.84, 0.99)</b>              | 0.93 (0.86, 1.00)        | 0.96 (0.89, 1.04)        | 0.98 (0.91, 1.07)        |
| <b>Fruit and nuts</b> |                        |                         |                                       |                          |                          |                          |
| <median               | 78,075                 | 1,664                   | Reference                             | Reference                | Reference                | Reference                |
| ≥median               | 77,328                 | 1,254                   | <b>0.74 (0.69, 0.80)</b>              | <b>0.67 (0.62, 0.72)</b> | <b>0.75 (0.69, 0.81)</b> | <b>0.84 (0.78, 0.91)</b> |
| <b>Cereals</b>        |                        |                         |                                       |                          |                          |                          |

|                                          |        |       |                          |                          |                          |                          |
|------------------------------------------|--------|-------|--------------------------|--------------------------|--------------------------|--------------------------|
| <median                                  | 78,467 | 1,748 | Reference                | Reference                | Reference                | Reference                |
| ≥median                                  | 76,936 | 1,170 | <b>0.67 (0.62, 0.72)</b> | <b>0.70 (0.65, 0.75)</b> | <b>0.77 (0.72, 0.83)</b> | <b>0.83 (0.76, 0.89)</b> |
| Fish and seafood                         |        |       |                          |                          |                          |                          |
| <median                                  | 90,376 | 1,881 | Reference                | Reference                | Reference                | Reference                |
| ≥median                                  | 65,027 | 1,037 | <b>0.75 (0.69, 0.80)</b> | <b>0.71 (0.66, 0.77)</b> | <b>0.81 (0.75, 0.87)</b> | <b>0.83 (0.77, 0.90)</b> |
| Monounsaturated/ saturated<br>fats ratio |        |       |                          |                          |                          |                          |
| <median                                  | 77,721 | 1,545 | Reference                | Reference                | Reference                | Reference                |
| ≥median                                  | 77,682 | 1,373 | <b>0.90 (0.84, 0.97)</b> | 0.97 (0.91, 1.05)        | 0.95 (0.88, 1.02)        | 0.94 (0.87, 1.01)        |
| Dairy products                           |        |       |                          |                          |                          |                          |
| ≥median                                  | 92,374 | 1,851 | Reference                | Reference                | Reference                | Reference                |
| <median                                  | 63,029 | 1,067 | <b>0.83 (0.77, 0.89)</b> | <b>0.83 (0.77, 0.89)</b> | <b>0.87 (0.81, 0.94)</b> | <b>0.88 (0.81, 0.95)</b> |
| Meat and meat products                   |        |       |                          |                          |                          |                          |
| ≥median                                  | 79,232 | 1,589 | Reference                | Reference                | Reference                | Reference                |
| <median                                  | 76,171 | 1,329 | <b>0.87 (0.81, 0.94)</b> | <b>0.91 (0.84, 0.98)</b> | <b>0.91 (0.84, 0.98)</b> | 0.95 (0.88, 1.03)        |
| Alcohol                                  |        |       |                          |                          |                          |                          |
| Never drink or over 2<br>drinks/day      | 82,828 | 1,790 | Reference                | Reference                | Reference                | Reference                |
| No more than 2 drinks/day                | 72,575 | 1,128 | <b>0.70 (0.65, 0.75)</b> | <b>0.68 (0.63, 0.73)</b> | <b>0.78 (0.72, 0.84)</b> | <b>0.84 (0.78, 0.91)</b> |

Abbreviations: COPD, chronic obstructive pulmonary disease.

<sup>1</sup> Crude model.

<sup>2</sup> Adjusted for age, sex, and BMI.

<sup>3</sup> Additionally adjusted for height, household income, education levels, physical activity, Townsend deprivation index, baseline metabolic syndrome, family history of diseases (hypertension, cardiovascular disease, and diabetes), and baseline FEV1/FVC ratio.

<sup>4</sup> Additionally adjusted for smoking status, alcohol consumption, baseline asthma, SII, ethnicity, creatinine, medication history (including antihypertensive drugs, lipid-lowering drugs, hypoglycemic drugs, allopurinol, and diuretics), personal history of diseases (hypertension, diabetes, and kidney disease), total energy intake, and serum urate.

<sup>5</sup> Hazard ratios (95% confidence interval) (all such values).

**Table S15. The associations of joint exposures of SU levels and MDS with the risk of COPD (n = 155,403).**

| Joint effect       |      | Number of    | Number of     | Model 1 <sup>1</sup>                  | Model 2 <sup>2</sup>     | Model 3 <sup>3</sup>     | Model 4 <sup>4</sup>     |
|--------------------|------|--------------|---------------|---------------------------------------|--------------------------|--------------------------|--------------------------|
| Serum urate levels | MDS  | participants | incident COPD |                                       |                          |                          |                          |
| Hyperuricemia      | 0-3  | 7,290        | 248           | Reference                             | Reference                | Reference                | Reference                |
| Hyperuricemia      | ≥3-5 | 6,700        | 161           | <b>0.68 (0.56, 0.83)</b> <sup>5</sup> | <b>0.64 (0.52, 0.78)</b> | <b>0.73 (0.60, 0.89)</b> | <b>0.73 (0.60, 0.89)</b> |
| Hyperuricemia      | ≥5   | 3,025        | 63            | <b>0.58 (0.44, 0.76)</b>              | <b>0.54 (0.41, 0.71)</b> | <b>0.66 (0.50, 0.88)</b> | <b>0.70 (0.53, 0.93)</b> |
| Normal             | 0-3  | 51,708       | 1,193         | <b>0.68 (0.60, 0.79)</b>              | <b>0.81 (0.71, 0.94)</b> | 0.90 (0.78, 1.03)        | 0.88 (0.77, 1.02)        |
| Normal             | ≥3-5 | 56,554       | 887           | <b>0.46 (0.40, 0.53)</b>              | <b>0.53 (0.46, 0.61)</b> | <b>0.65 (0.56, 0.75)</b> | <b>0.70 (0.60, 0.81)</b> |
| Normal             | ≥5   | 30,126       | 366           | <b>0.35 (0.30, 0.41)</b>              | <b>0.39 (0.33, 0.46)</b> | <b>0.53 (0.45, 0.63)</b> | <b>0.61 (0.52, 0.73)</b> |

Abbreviations: SU, serum urate; COPD, chronic obstructive pulmonary disease.

<sup>1</sup> Crude model.

<sup>2</sup> Adjusted for age, sex, and BMI.

<sup>3</sup> Additionally adjusted for height, household income, education levels, physical activity, Townsend deprivation index, baseline metabolic syndrome, family history of diseases (hypertension, cardiovascular disease, and diabetes), and baseline FEV1/FVC ratio.

<sup>4</sup> Additionally adjusted for smoking status, alcohol consumption, baseline asthma, SII, ethnicity, creatinine, medication history (including antihypertensive drugs, lipid-lowering drugs, hypoglycemic drugs, allopurinol, and diuretics), and personal history of diseases (hypertension, diabetes, and kidney disease).

<sup>5</sup> Hazard ratios (95% confidence interval) (all such values).

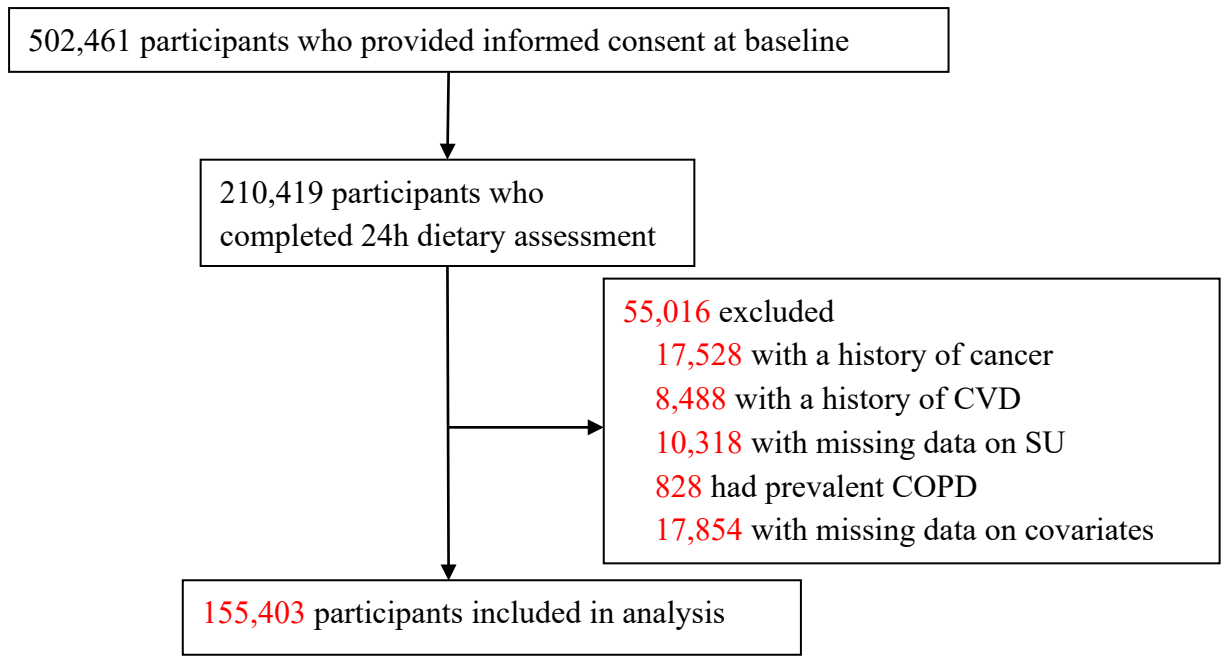

**Fig. S1 Flowchart for the selection of the analyzed study sample**

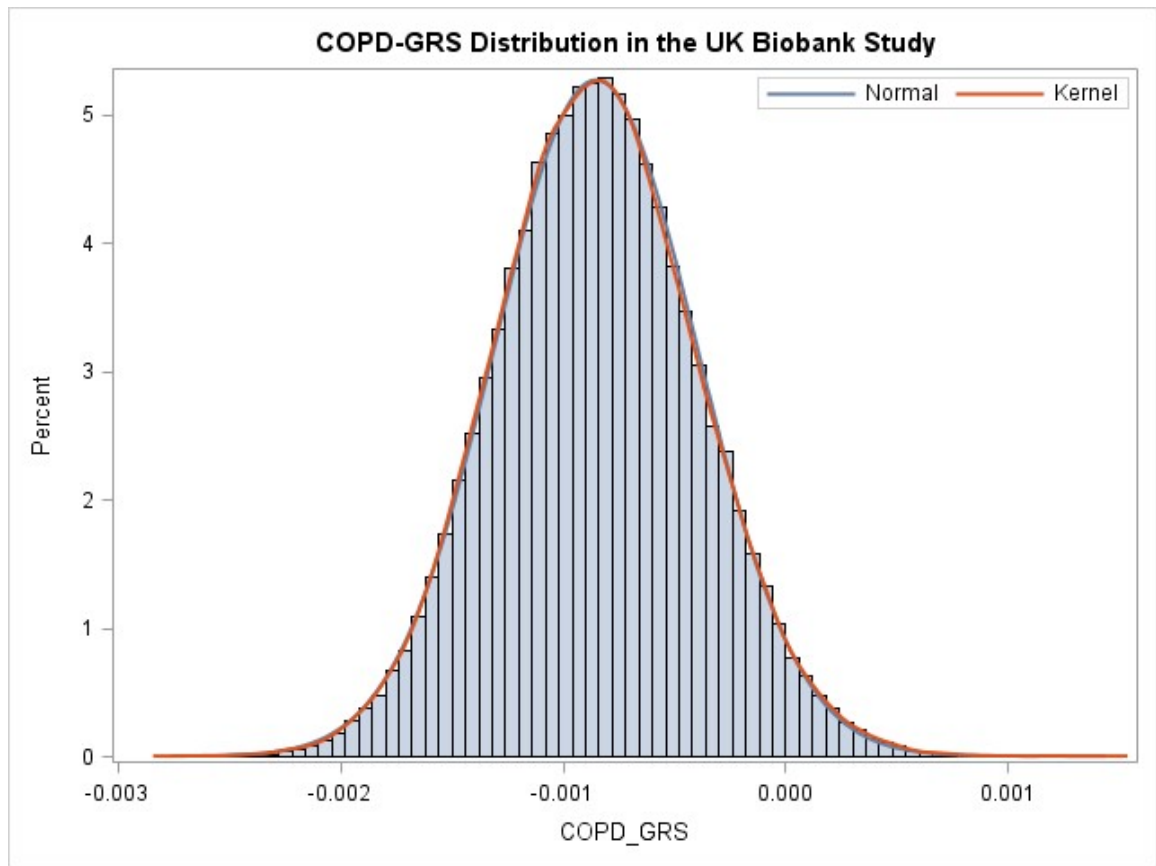

**Fig. S2 Distribution of COPD-GRS**
